# Supplementary figures and images for: How Rainfall Variation Influences Reproductive Patterns of African Savanna Ungulates in an Equatorial Region Where Photoperiod Variation Is Absent
Source: PLOS journal article supplement (doi:10.1371/journal.pone.0133744), 2015-08-21

**Topi**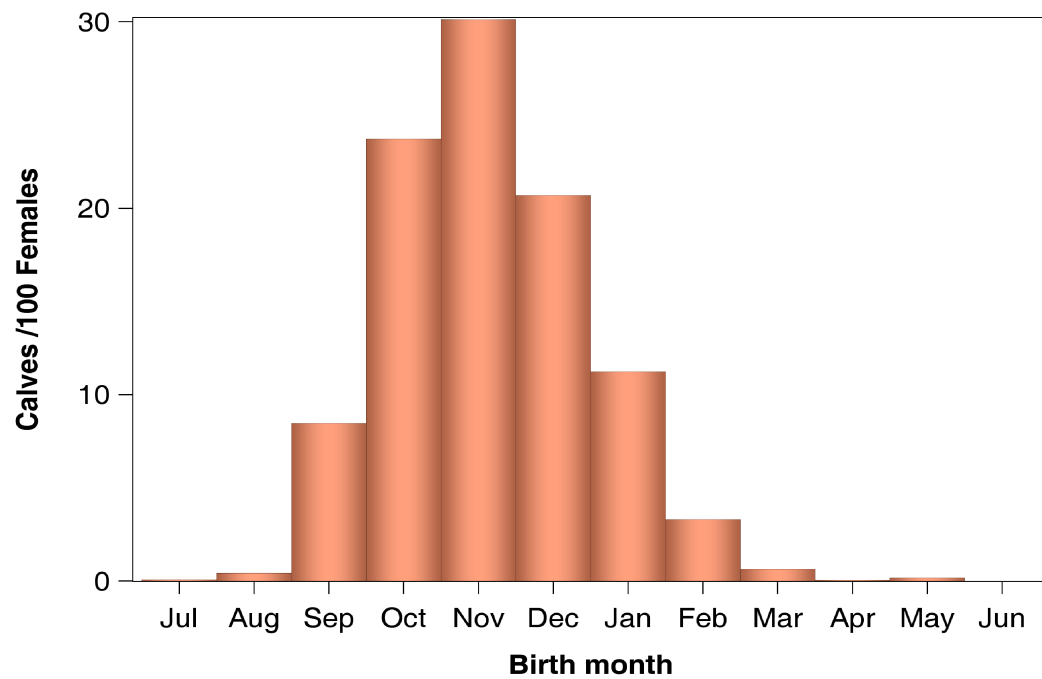**Hartebeest**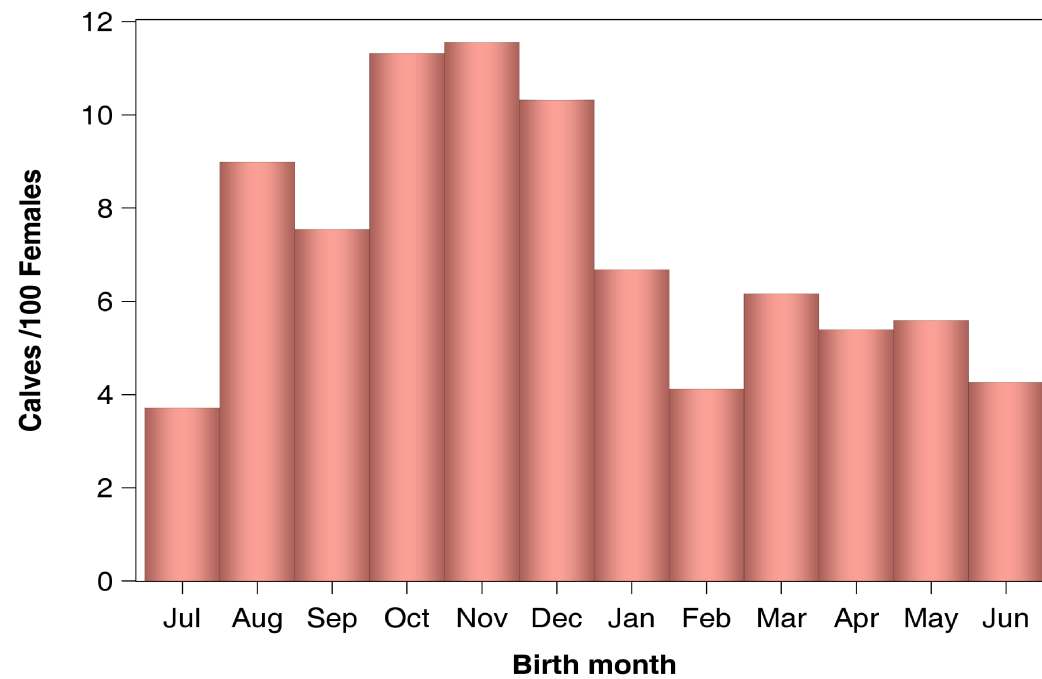**Warthog**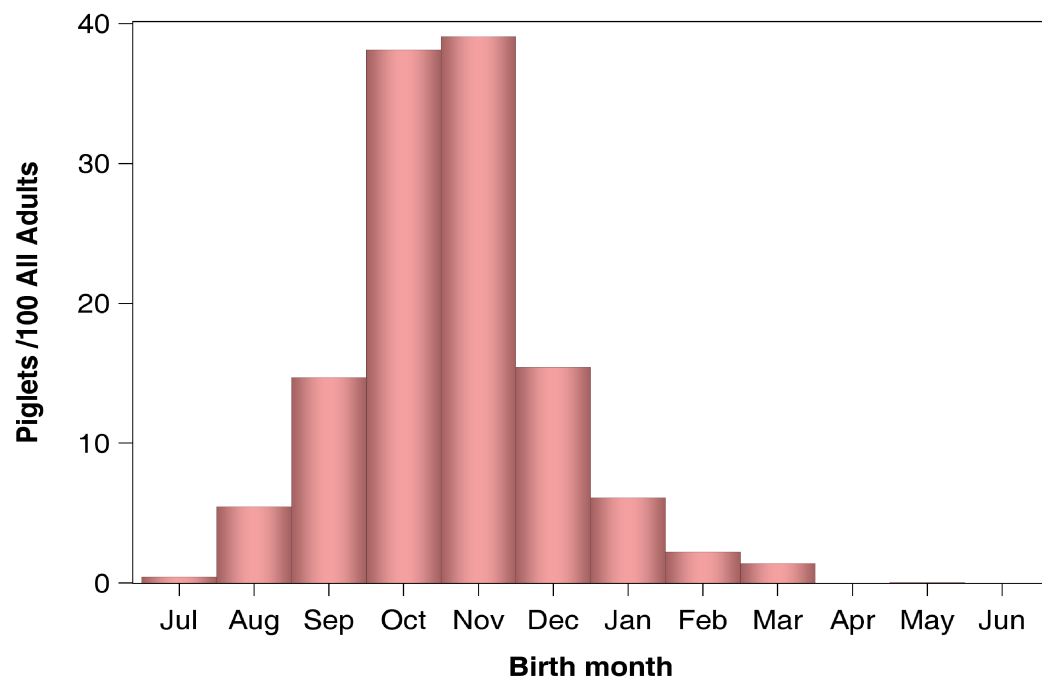**Impala**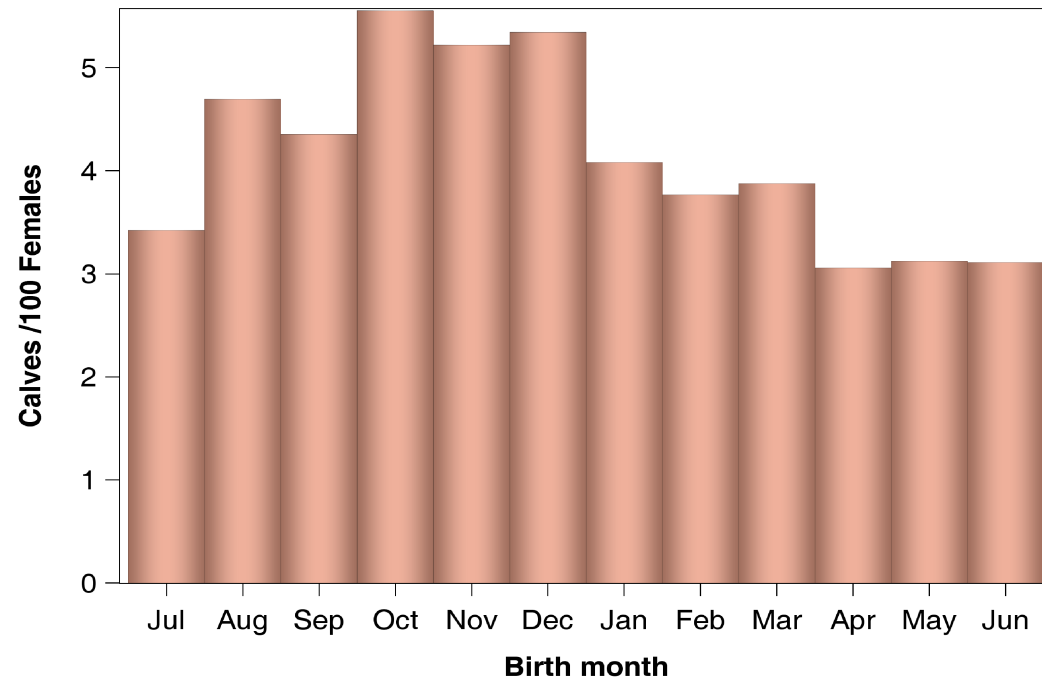

Supplement: S6 (10.1371/journal.pone.0133744.s006) [file journal.pone.0133744.s006]
